# Supplementary material for: Antibacterial and safe chitosan–graphene hydrogel films: a promising nanotherapeutic for Staphylococcus aureus wound infections
Source: Royal Society of Chemistry journal article supplement (doi:10.1039/d4bm01276c), 2024-11-21
Supplement: d4bm01276c1.pdf [file d4bm01276c1.pdf]

## Supporting Information

# Antibacterial and Safe Chitosan-Graphene Hydrogel Film: A Promising Nanotherapeutics for *Staphylococcus aureus* Wound Infection

Priyadarshani Choudhary,<sup>a,b</sup> Baskaran Ramalingam,<sup>a,c,#</sup> Somashree Bose<sup>b,d,#</sup> and Sujoy K Das<sup>b,d\*</sup>

<sup>a</sup>Biological Materials Laboratory, Council of Scientific and Industrial Research (CSIR)-Central Leather Research Institute (CLRI), Chennai-600020, India, and <sup>b</sup>Academy of Scientific and Innovative Research (AcSIR), Ghaziabad-201002, India, <sup>c</sup>Department of Civil Engineering, Anna University, Chennai-600020, India and <sup>d</sup>Infectious Diseases and Immunology Division, Council of Scientific and Industrial Research (CSIR)-Indian Institute of Chemical Biology (IICB), Kolkata-700032, India.

#Both have equal contributions.

**Table S1.** Percentage weight loss of chitosan and CGrAP film measured from TGA

| Material                          | Weight loss (%) |
|-----------------------------------|-----------------|
| Chitosan                          | 65.21           |
| CGrAP nanocomposite hydrogel film | 58.23           |

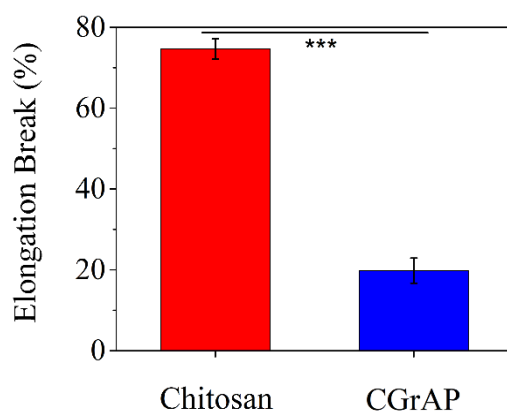

**Fig. S1.** Elongation at Break of chitosan and CGrAP nanocomposite hydrogel films. Data represents an average of five independent experiments;  $\pm$  SD shown by error bar (\*\*\*) $p$  value  $<0.01$ ).

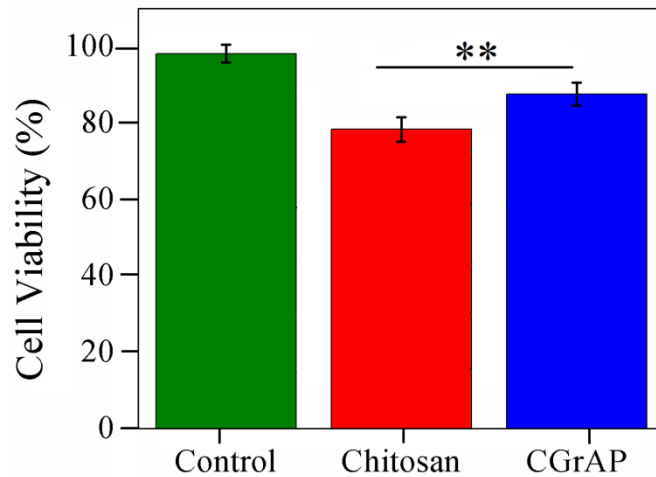

**Fig. S2.** MTT assay on L929 fibroblast cells on treatment with chitosan and CGrAP nanocomposite hydrogel film. (\*\* $p$  value < 0.02).

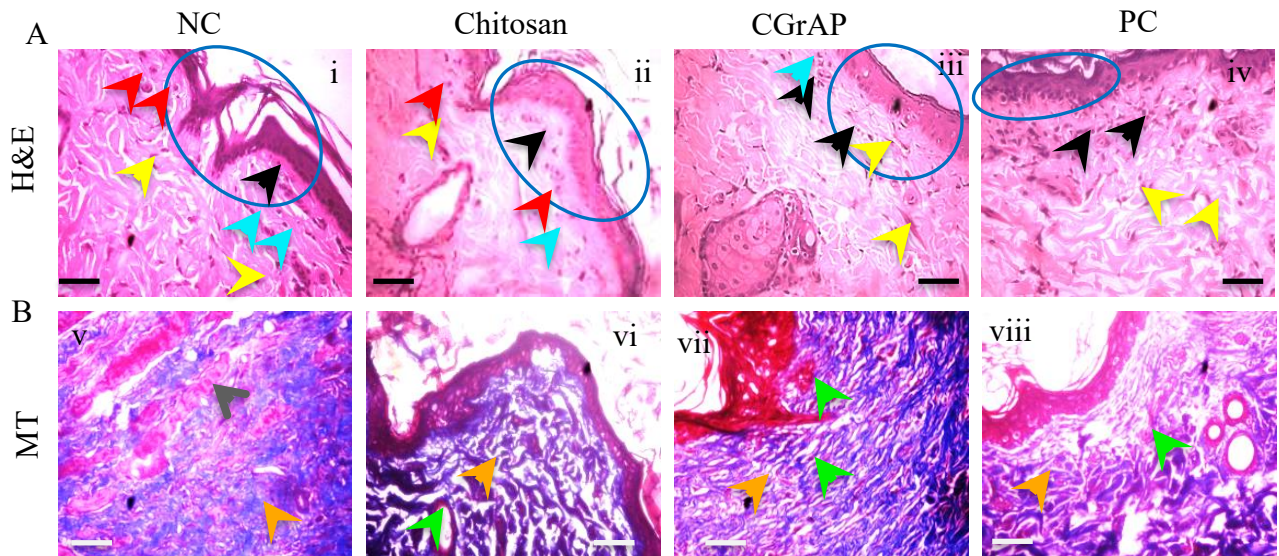

**Fig. S3.** Histological (H&E) images (A) and Masson's Trichrome (B) of the skin tissue at 14<sup>th</sup> day after treatment with NC (i and v); Cs (ii and vi); CGrAP nanobiocomposite hydrogel film (iii and vii) and PC (iv and viii) respectively in *S. aureus* infected Wistar rat model. (Scale bar 100  $\mu$ m). (Arrow indicates: red- neutrophils; blue- lymphocytes; black-epithelial cells; yellow- fibroblast cells; green arrow- blood vessels; orange arrow-collagen; dark grey arrow- damaged blood cells dark blue circle marks the regeneration of epidermal layer).

**Table S2.** Draize grading scale.

| <b>Erythema Formation</b>   |   | <b>Edema Formation</b>   |   |
|-----------------------------|---|--------------------------|---|
| No erythema                 | 0 | No edema                 | 0 |
| Very slight erythema        | 1 | Very Slight Edema        | 1 |
| Slight erythema             | 2 | Slight Edema             | 2 |
| Moderate to severe erythema | 3 | Moderate to severe edema | 3 |

**Table S3.** Body weight during acute toxicity

| <b>Parameters</b>                   | <b>Control</b>      |                      | <b>CGrAP Film</b>   |                      |
|-------------------------------------|---------------------|----------------------|---------------------|----------------------|
|                                     | 1 <sup>st</sup> Day | 14 <sup>th</sup> Day | 1 <sup>st</sup> Day | 14 <sup>th</sup> Day |
| Body Weight (Prior to test perform) | 205 ± 2.3 g         | 220 ± 3.3 g          | 210 ± 2.5 g         | 226 ± 2.9 g          |

**Table S4.** Physical characteristics during acute toxicity

| Parameters                | Saline              |                      | CGrAP Film          |                      |
|---------------------------|---------------------|----------------------|---------------------|----------------------|
|                           | 1 <sup>st</sup> Day | 14 <sup>th</sup> Day | 1 <sup>st</sup> Day | 14 <sup>th</sup> Day |
| <b>Behavioral pattern</b> |                     |                      |                     |                      |
| First 24 h                | Normal              | Normal               | Normal              | Normal               |
| <b>Skin Toxicity</b>      |                     |                      |                     |                      |
| <b>Changes in skin</b>    |                     |                      |                     |                      |
| Blanching                 | Absent              | Absent               | Absent              | Absent               |
| Cyanosis                  | Absent              | Absent               | Absent              | Absent               |
| Erythema                  | Absent              | Absent               | Absent              | Absent               |
| Itching                   | Absent              | Absent               | Absent              | Absent               |
| <b>Changes in Fur</b>     |                     |                      |                     |                      |
| Falling in Fur            | Absent              | Absent               | Absent              | Absent               |
| Discoloration             | Absent              | Absent               | Absent              | Absent               |
| Piloerection              | Absent              | Absent               | Absent              | Absent               |
| <b>Changes in Eyes</b>    |                     |                      |                     |                      |
| Ptosis                    | Absent              | Absent               | Absent              | Absent               |
| Exophthalmos              | Absent              | Absent               | Absent              | Absent               |
| Redness                   | Absent              | Absent               | Absent              | Absent               |
| Pupil Dilated             | Absent              | Absent               | Absent              | Absent               |
| Pupil Constricted         | Absent              | Absent               | Absent              | Absent               |
| <b>Salivation</b>         |                     |                      |                     |                      |
| Viscid                    | Absent              | Absent               | Absent              | Absent               |
| Watery                    | Absent              | Absent               | Absent              | Absent               |

**Table S5.** Behavioral pattern during acute toxicity

| Parameters                    | Saline              |                      | CGrAP Film          |                      |
|-------------------------------|---------------------|----------------------|---------------------|----------------------|
|                               | 1 <sup>st</sup> Day | 14 <sup>th</sup> Day | 1 <sup>st</sup> Day | 14 <sup>th</sup> Day |
| <b>Behavioral Pattern</b>     |                     |                      |                     |                      |
| Restlessness                  | Absent              | Absent               | Absent              | Absent               |
| Grooming                      | Absent              | Absent               | Absent              | Absent               |
| Lying flat on Belly           | Absent              | Absent               | Absent              | Absent               |
| Lying flat on Back            | Absent              | Absent               | Absent              | Absent               |
| Lying flat on side            | Absent              | Absent               | Absent              | Absent               |
| <b>Respiration</b>            |                     |                      |                     |                      |
| Depression                    | Absent              | Absent               | Absent              | Absent               |
| Stimulation                   | Absent              | Absent               | Absent              | Absent               |
| Failure                       | Absent              | Absent               | Absent              | Absent               |
| <b>Central Nervous System</b> |                     |                      |                     |                      |
| Defecation                    | Absent              | Absent               | Absent              | Absent               |
| Urination                     | Absent              | Absent               | Absent              | Absent               |
| Squatting                     | Absent              | Absent               | Absent              | Absent               |
| Ataxic Gait                   | Absent              | Absent               | Absent              | Absent               |
| Timidity                      | Absent              | Absent               | Absent              | Absent               |
| Writhing                      | Absent              | Absent               | Absent              | Absent               |
| Tremors                       | Absent              | Absent               | Absent              | Absent               |
| Paresis of hind limb          | Absent              | Absent               | Absent              | Absent               |
| Paresis of forepaws           | Absent              | Absent               | Absent              | Absent               |
| Twitches                      | Absent              | Absent               | Absent              | Absent               |
| Convulsion                    | Absent              | Absent               | Absent              | Absent               |
| Clonic                        | Absent              | Absent               | Absent              | Absent               |
| Tonic                         | Absent              | Absent               | Absent              | Absent               |
| Rolling & Jumping             | Absent              | Absent               | Absent              | Absent               |

**Table S6.** Blood profile test

| <b>Differential Count</b>    | <b>Saline</b> | <b>CGrAP film</b> |
|------------------------------|---------------|-------------------|
| Neutrophils (%)              | 10.4 ± 1.2    | 10.1 ± 1.3        |
| Lymphocytes (%)              | 86.2 ± 2.2    | 87.7 ± 1.7***     |
| Eosinophils (%)              | 1.3 ± 0.02    | 1.3 ± 0.01        |
| Monocytes (%)                | 1.43 ± 4.6    | 1.47 ± 8.9***     |
| Basophils (%)                | 0.01 ± 0.001  | 0.01 ± 0.001      |
| Haemoglobin (g/dl)           | 13.12 ± 1.2   | 14.4 ± 2.1***     |
| Haematocrit (%)              | 39.2 ± 4.6    | 36.1 ± 4.1***     |
| Platelet Count (lakhs/cu mm) | 6.80 ± 0.413  | 7.59 ± 0.213***   |
| <b>Biochemistry</b>          |               |                   |
| Urea (mg/dl)                 | 19.5 ± 4      | 18.4 ± 4***       |
| Creatinine (mg/dl)           | 0.55 ± 0.012  | 0.57 ± 0.003***   |
| <b>Liver Function Test</b>   |               |                   |
| SGOT (U/L)                   | 119.11 ± 4.5  | 126.15 ± 5.3 ***  |
| SGPT (U/L)                   | 33.66 ± 3.1   | 30.83 ± 2.3***    |
| Alkaline phosphatase (U/L)   | 72.11 ± 3.4   | 75.43 ± 2.6 ***   |
| T. Protein (mg/dl)           | 6.6 ± 0.1     | 7.5 ± 1.7***      |
| Albumin (mg/dl)              | 3.4 ± 0.4     | 3.7 ± 1.6***      |
| T. Bilirubin (mg/dl)         | 0.8 ± 0.002   | 0.9 ± 0.006***    |
| D. Bilirubin (mg/dl)         | 0.1 ± 0.04    | 0.2 ± 0.04***     |
| <b>Lipid Profile</b>         |               |                   |
| Total cholesterol (mg/dl)    | 114.5 ± 4.7   | 112.5 ± 7***      |
| Triglyceride (mg/dl)         | 81.56 ± 12    | 78.98 ± 14***     |
| HDL cholesterol (mg/dl)      | 52.67 ± 3     | 49.55 ± 5 ***     |
| LDL cholesterol (mg/dl)      | 48.79 ± 2.6   | 46.64 ± 1.6***    |
| VLDL cholesterol (mg/dl)     | 15.6 ± 3.77   | 17.8 ± 3.69***    |

\*\*\*p value < 0.002 with respect to control
